# Supplementary material
Source: Springer Nature journal article supplement (https://www.springermedizin.de/resource/supplementary/13046_2009_242_MOESM1_ESM.pdf/9661622)

1 2 3 4 5 6

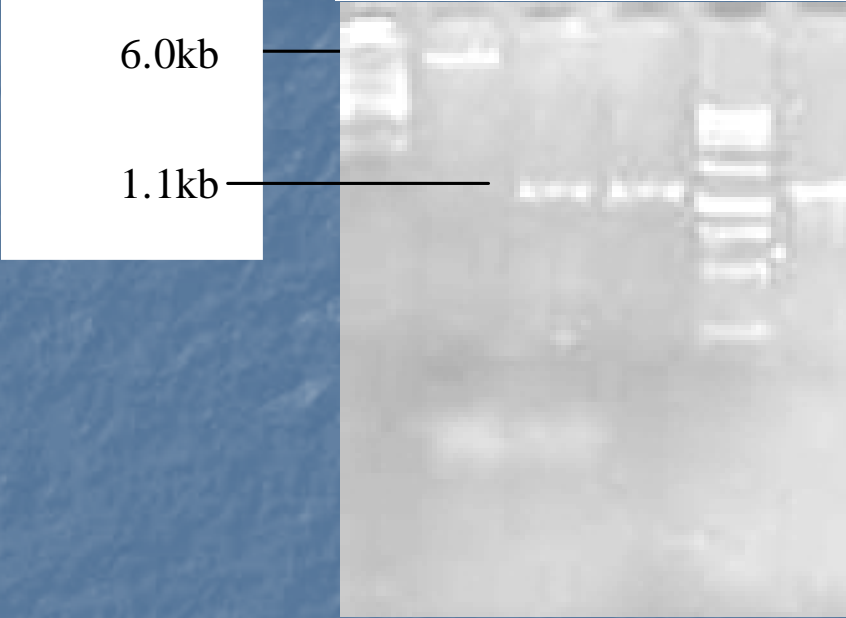

**Figure1**  
Lane1 :HindIII Marker  
Lane2:PGEX-TK  
Lane3,4,6:HS V-TK DNA  
Lane5:250 bp Marker

Supplement: MOESM1 [file 9661622]
